# Supplementary material for: Analysis of influencing factors on review efficiency of multidisciplinary scientific research projects using DEMATEL with a 5-point scale
Source: PubMed Central journal article supplement (PMC11637369; doi:10.1371/journal.pone.0315349), 2024-12-12
Supplement: pone.0315349.s001.pdf [file pone.0315349.s001.pdf]

## **Questionnaire on reviewing multidisciplinary scientific research project**

Instructions: Please rate each factor based on its influence on the review efficiency of multidisciplinary scientific research projects. Use a scale from 1 (Unimportant) to 5 (Very Important). Additionally, each question includes a brief description to clarify its scope.

1. Unimportant
2. Relatively Low
3. General
4. Relatively High
5. Very Important

### **Part 1: Project Factors**

#### 1. Scope of Project Knowledge:

*Description: Assess how the breadth and depth of knowledge within the project affect its review process.*

Rating: \_\_\_\_\_

#### 2. Interdisciplinary Collaboration:

*Description: Evaluate the impact of collaboration between different disciplines on the review efficiency.*

Rating: \_\_\_\_\_

#### 3. Resource Allocation:

*Description: Consider how the distribution and availability of resources influence the review process.*

Rating: \_\_\_\_\_

#### 4. Market Factors:

*Description: Rate the effect of market-related factors, such as demand and relevance, on the review efficiency.*

Rating: \_\_\_\_\_

#### 5. Time factors:

*Description: Refer to the adherence to project timelines and milestones, indicating the efficiency and effectiveness of project management and its impact on the review process.*

Rating: \_\_\_\_\_

#### 6. Social factors:

*Description: Encompass the societal impacts, stakeholder interests, and ethical considerations of a project, reflecting its holistic approach and broader implications beyond technical and financial aspects.*

Rating: \_\_\_\_\_

#### 7. Psychological factors:

*Description: Involve the morale, motivation, and mental well-being of the project team, significantly influencing project outcomes and the team's ability to proactively address challenges.*

Rating: \_\_\_\_\_

### **Part 2: Review Factors**

#### 1. Review Criteria:

*Description: Reflect on how clearly defined and relevant criteria affect the objectivity and consistency of reviews.*

Rating: \_\_\_\_\_

2. Stakeholder Involvement:

*Description: Determine the importance of involving stakeholders in the review process for comprehensive insights.*

Rating: \_\_\_\_\_

3. Psychological Factors:

*Description: Assess the impact of psychological aspects, such as motivation and perception, on the review process.*

Rating: \_\_\_\_\_

4. Review Methodology:

*Description: Evaluate the influence of the methodologies and techniques used in the review process.*

Rating: \_\_\_\_\_

5. Feedback Mechanisms:

*Description: Consider the role of feedback in shaping the review process and its outcomes.*

Rating: \_\_\_\_\_

6. Transparency and Openness:

*Description: Rate the impact of transparency in criteria, methodologies, and feedback on the review process.*

Rating: \_\_\_\_\_

7. Continuous Monitoring:

*Description: Assess the importance of ongoing monitoring and periodic evaluations in the review process.*

Rating: \_\_\_\_\_

**Additional Questions**

1. In your opinion, which factor(s) most significantly impact the efficiency of reviews in multidisciplinary projects?

*Description: Share your opinion on which factors most significantly impact the efficiency of reviews in multidisciplinary projects.*

Response: \_\_\_\_\_

2. Do you have any suggestions for improving the review process in multidisciplinary scientific research projects?

*Description: Provide any suggestions you have for improving the review process in multidisciplinary scientific research projects.*

Response: \_\_\_\_\_
